# Supplementary material for: Dosage Regulation of the Active X Chromosome in Human Triploid Cells
Source: PubMed Central journal article supplement (PMC2777382; doi:10.1371/journal.pgen.1000751), 2009-12-04

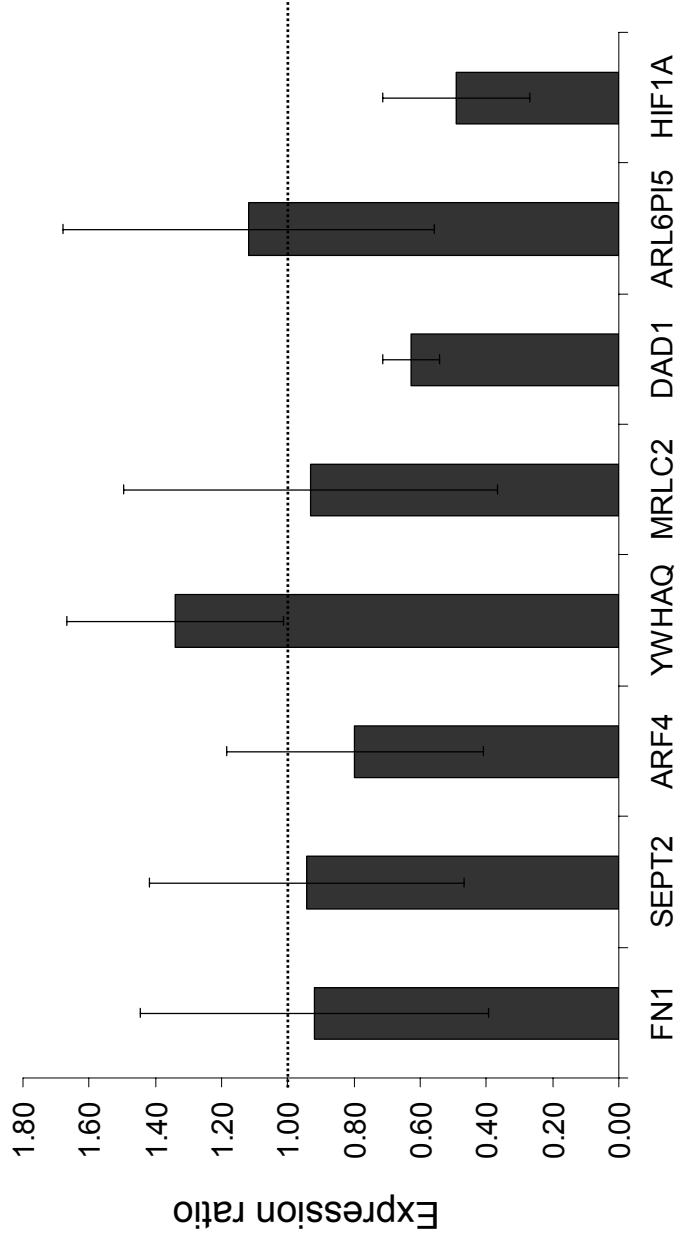

Supplement: pgen.1000751.s002.pdf [file pgen.1000751.s002.pdf]
